# Supplementary material for: Screening Fungicides for Controlling Wheat Crown Rot Caused by Fusarium pseudograminearum across Hebei Province in China
Source: MDPI journal article supplement (doi:10.3390/agriculture12101643), 2022-10-08
Supplement: s1 [file s1]

Table S1 Influence of seed dressing on wheat growth and yield parameters (Xian County 2017)

| Treatments              | Wheat growth at seedling stage |                       |                        |                                    | Parameters at adult stage |                         |                          |                        |
|-------------------------|--------------------------------|-----------------------|------------------------|------------------------------------|---------------------------|-------------------------|--------------------------|------------------------|
|                         | Density pl/m <sup>2</sup>      | Tiller/plan<br>t      | Secondary<br>roots     | Fertile tillers<br>/m <sup>2</sup> | grains/spike              | TGW (g)                 | Yield/ kg/m <sup>2</sup> | Increased<br>yield (%) |
| Cruiser Plus            | 1474±18.89 <sup>a†</sup>       | 4.4±0.45 <sup>a</sup> | 15.0±0.73 <sup>a</sup> | 611±22.66 <sup>a</sup>             | 35.5±0.49 <sup>a</sup>    | 42.2±0.47 <sup>ab</sup> | 0.778±0.02 <sup>a</sup>  | 6.0                    |
| Celest                  | 1453±22.22 <sup>a</sup>        | 3.7±0.13 <sup>b</sup> | 12.3±0.45 <sup>b</sup> | 628±24.97 <sup>a</sup>             | 35.1±0.57 <sup>a</sup>    | 40.9±1.12 <sup>cd</sup> | 0.766±0.02 <sup>ab</sup> | 4.2                    |
| Cruiser<br>Plus+Horizon |                                |                       |                        | 626±27.69 <sup>a</sup>             | 35.4±0.43 <sup>a</sup>    | 41.1±0.67 <sup>bc</sup> | 0.774±0.02 <sup>a</sup>  | 5.4                    |
| Celest+Horizon          |                                |                       |                        | 618±23.59 <sup>a</sup>             | 35.2±0.50 <sup>a</sup>    | 42.7±0.84 <sup>a</sup>  | 0.789±0.03 <sup>a</sup>  | 7.5                    |
| Control                 | 1480±15.19 <sup>a</sup>        | 3.5±0.15 <sup>b</sup> | 10.0±0.50 <sup>c</sup> | 618±24.83 <sup>a</sup>             | 35.2±0.54 <sup>a</sup>    | 39.8±.94 <sup>d</sup>   | 0.734±0.04 <sup>b</sup>  |                        |
| F                       | 2.868                          | 12.372                | 85.832                 | 0.390                              | 0.454                     | 9.131                   | 2.631                    |                        |
| <i>df</i>               | 2                              | 2                     | 2                      | 4                                  | 4                         | 4                       | 4                        |                        |
| <i>p</i> -value         | 0.096                          | 0.001                 | 0                      | 0.813                              | 0.768                     | 0                       | 0.065                    |                        |

†Note: Different lowercase letters marked following the mean values identify significantly different means (Duncans' new multiple-range test ( $p < 0.05$ ))

Table S2 Relative control efficacy of the two agents in the field and their combined treatments (Xian County 2017)

| Treatments              | Seedling stage          |         | Adult stage                  |         | Increased control efficacies (%)   |                            |
|-------------------------|-------------------------|---------|------------------------------|---------|------------------------------------|----------------------------|
|                         | DI                      | RCE (%) | DI                           | RCE (%) | Dressing +Spraying<br>vs. Dressing | Cruiser Plus<br>vs. Celest |
| Cruiser Plus            | 4.30±1.09 <sup>c†</sup> | 58.61   | 12.89±<br>2.30 <sup>bc</sup> | 49.42   | -                                  | 22.46                      |
| Celest                  | 6.11±0.38 <sup>b</sup>  | 41.19   | 15.20±0.45 <sup>b</sup>      | 40.36   | -                                  | -                          |
| Cruiser<br>Plus+Horizon | -                       | -       | 10.22±2.01 <sup>c</sup>      | 59.92   | 21.24                              | 32.58                      |
| Celest+Horizon          | -                       | -       | 13.97±0.96 <sup>b</sup>      | 45.19   | 11.99                              | -                          |
| Control                 | 10.39±0.56 <sup>a</sup> | -       | 25.49±1.43 <sup>a</sup>      | -       | -                                  | -                          |
| F                       | 53.251                  |         | 40.98                        |         |                                    |                            |
| <i>df</i>               | 2                       |         | 4                            |         |                                    |                            |

|                 |   |   |   |
|-----------------|---|---|---|
| <i>p</i> -value | 0 | 0 | 6 |
|-----------------|---|---|---|

†Note: Different lowercase letters marked following the mean values identify significantly different means (Duncans' new multiple-range test,  $p < 0.05$ ,  $n = 3$ ).
